# Supplementary material
Source: PubMed Central journal article supplement (PMC1464822)

**Protocol S1- European LD map.** Recombination intensities measured by sperm typing as shown in manuscript Figure 2 (panel A) compared to the intensities calculated with three different LD estimators. The estimators used the Perlegen SNP database (panel B) or the Hap Map SNP database (panel C) for the European American population. LD-Hat is shown in green, Hotspotter in blue, and ABC in red. Note that some of the peaks at ~70 kb, ~90 kb and ~95 kb are off scale.

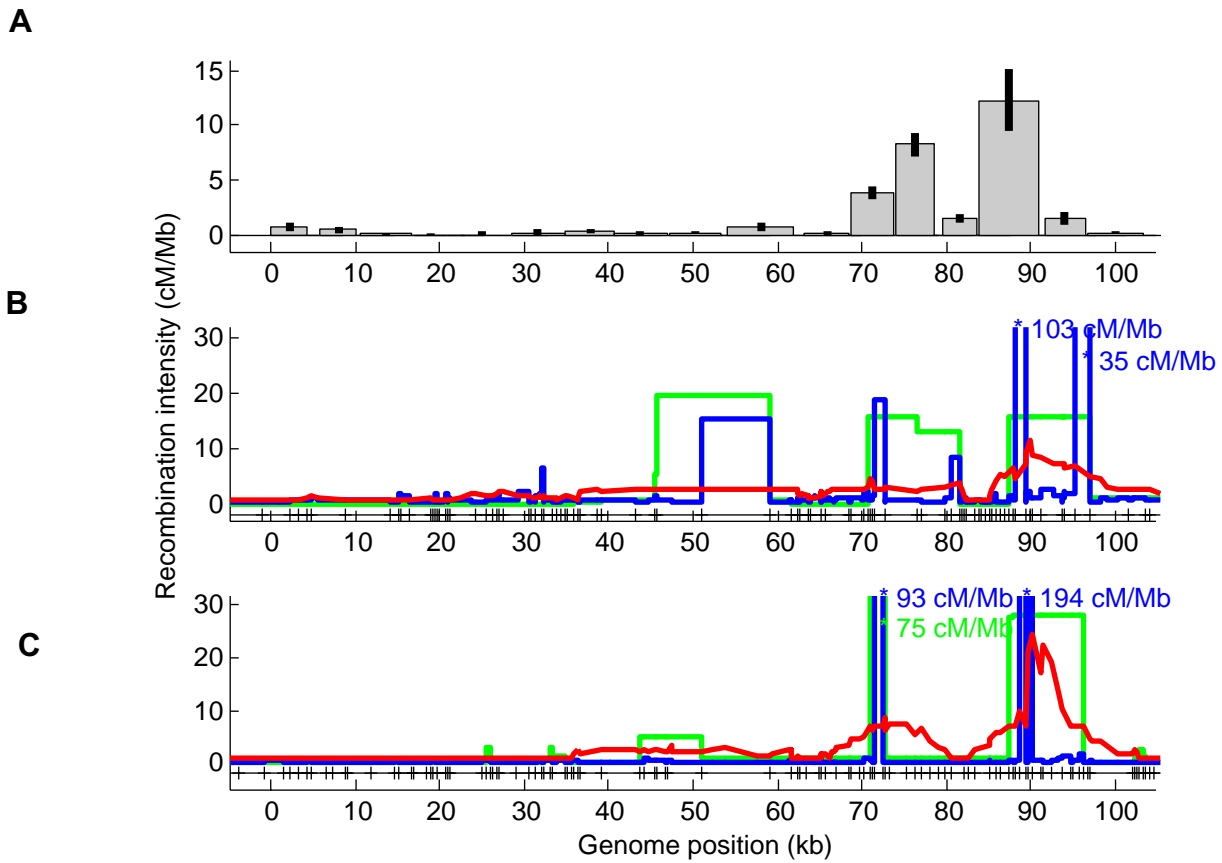

Supplement: pgen.0020070.sd001.pdf [file pgen.0020070.sd001.pdf]
