# Supplementary material
Source: PubMed Central journal article supplement (PMC1464822)
Supplement: pgen.0020070.sd002.pdf [file pgen.0020070.sd002.pdf]

**Protocol S2 -Crossover distribution for Interval 13 and 15.** Shown are the recombinant haplotypes, where black and red are the different parental alleles and the capital letters represent the SNPs used for the second round allele-specific amplification (column 1); the typed SNP, where the first and the last SNP are the ones used for allele-specific amplification (column 2); the number of crossovers between two adjacent SNPs, eg. 29 crossovers between rs2091891 and rs11088498, (column 3); the fraction of crossovers per total recombinants (column 4); the recombination intensity, which is crossovers per total meioses analyzed, times 2 (to account for both reciprocals), then times one hundred and divided by the distance between two adjacent SNPs in Mb (column 5); the distance between adjacent SNPs (column 6); and the position of the SNP in the 103 kb region studied (column 7).

**Crossover distribution for Interval 13**

Individual 5139

**Type A**

|             | SNP        | # of crossovers | % recombinants         | cm/Mb | fragment size | Position |
|-------------|------------|-----------------|------------------------|-------|---------------|----------|
| Start       | rs2091891  |                 |                        |       |               | 73976    |
| G-a-c-t-t-T | rs11088498 | 29              | 97%                    | 19.70 | 2328          | 76304    |
| G-g-c-t-t-T | rs11702550 | 0               | 0%                     | 0.00  | 459           | 76763    |
| G-g-t-t-t-T | rs1006891  | 0               | 0%                     | 0.00  | 919           | 77682    |
| G-g-t-c-t-T | rs1006890  | 0               | 0%                     | 0.00  | 307           | 77989    |
| G-g-t-c-c-T | rs2253861  | 1               | 3%                     | 3.13  | 507           | 78496    |
|             | Total      | 30              | Total meioses analyzed |       | 126,000       |          |

Individual 5139

**Type B**

|             | SNP        | # of crossovers | % recombinants         | cm/Mb | fragment size | Position |
|-------------|------------|-----------------|------------------------|-------|---------------|----------|
| Start       | rs2091891  |                 |                        |       |               | 73976    |
| C-g-t-c-c-C | rs11088498 | 18              | 86%                    | 27.01 | 2328          | 76304    |
| C-a-t-c-c-C | rs11702550 | 3               | 14%                    | 7.21  | 459           | 76763    |
| C-a-c-c-c-C | rs1006891  | 0               | 0%                     | 0.00  | 919           | 77682    |
| C-a-c-t-c-C | rs1006890  | 0               | 0%                     | 0.00  | 307           | 77989    |
| C-a-c-t-t-C | rs2253861  | 0               | 0%                     | 0.00  | 507           | 78496    |
|             | Total      | 21              | Total meioses analyzed |       | 89,300        |          |

Individual 5141

## Type A

|                             | SNP        | # of<br>crossovers | %<br>recombinants      | cm/Mb | fragment<br>size | Position |
|-----------------------------|------------|--------------------|------------------------|-------|------------------|----------|
| Start                       | rs2091891  |                    |                        |       |                  | 73976    |
| <b>G</b> -a-c-t-t- <b>T</b> | rs11088498 | 10                 | 77%                    | 20.45 | 2328             | 76304    |
| <b>G</b> -g-c-t-t- <b>T</b> | rs11702550 | 1                  | 8%                     | 10.37 | 459              | 76763    |
| <b>G</b> -g-t-t-t- <b>T</b> | rs1006891  | 0                  | 0%                     | 0.00  | 919              | 77682    |
| <b>G</b> -g-t-c-t- <b>T</b> | rs1006890  | 0                  | 0%                     | 0.00  | 307              | 77989    |
| <b>G</b> -g-t-c-c- <b>T</b> | rs2253861  | 2                  | 15%                    | 18.78 | 507              | 78496    |
| Total                       |            | 13                 | Total meiosis analyzed |       | 42,000           |          |

Individual 5141

## Type B

|                             | SNP        | # of<br>crossovers | %<br>recombinants      | cm/Mb | fragment<br>size | Position |
|-----------------------------|------------|--------------------|------------------------|-------|------------------|----------|
| Start                       | rs2091891  |                    |                        |       |                  | 73976    |
| <b>C</b> -g-t-c-c- <b>C</b> | rs11088498 | 19                 | 95%                    | 17.30 | 2328             | 76304    |
| <b>C</b> -a-t-c-c- <b>C</b> | rs11702550 | 1                  | 5%                     | 14.63 | 459              | 76763    |
| <b>C</b> -a-c-c-c- <b>C</b> | rs1006891  | 0                  | 0%                     | 0.00  | 919              | 77682    |
| <b>C</b> -a-c-t-c- <b>C</b> | rs1006890  | 0                  | 0%                     | 0.00  | 307              | 77989    |
| <b>C</b> -a-c-t-t- <b>C</b> | rs2253861  | 0                  | 0%                     | 0.00  | 507              | 78496    |
| Total                       |            | 20                 | Total meiosis analyzed |       | 60,400           |          |

Individual 7010

## Type A

|                             | SNP        | # of<br>crossovers | %<br>recombinants      | cm/Mb | fragment<br>size | Position |
|-----------------------------|------------|--------------------|------------------------|-------|------------------|----------|
| Start                       | rs2091891  |                    |                        |       |                  | 73976    |
| <b>G</b> -a-c-t-t- <b>T</b> | rs11088498 | 10                 | 40%                    | 3.8   | 2328             | 76304    |
| <b>G</b> -g-c-t-t- <b>T</b> | rs11702550 | 1                  | 4%                     | 2.0   | 459              | 76763    |
| <b>G</b> -g-t-t-t- <b>T</b> | rs1006891  | 1                  | 4%                     | 1.0   | 919              | 77682    |
| <b>G</b> -g-t-c-t- <b>T</b> | rs1006890  | 1                  | 4%                     | 2.9   | 307              | 77989    |
| <b>G</b> -g-t-c-c- <b>T</b> | rs2253861  | 12                 | 48%                    | 21.2  | 507              | 78496    |
| Total                       |            | 25                 | Total meiosis analyzed |       | 223,200          |          |

Individual 7010

## Type B

|                             | SNP        | # of<br>crossovers | %<br>recombinants      | cm/Mb | fragment<br>size | Position |
|-----------------------------|------------|--------------------|------------------------|-------|------------------|----------|
| Start                       | rs2091891  |                    |                        |       |                  | 73976    |
| <b>C</b> -g-t-c-c- <b>C</b> | rs11088498 | 14                 | 29%                    | 3.4   | 2328             | 76304    |
| <b>C</b> -a-t-c-c- <b>C</b> | rs11702550 | 2                  | 4%                     | 2.4   | 459              | 76763    |
| <b>C</b> -a-c-c-c- <b>C</b> | rs1006891  | 1                  | 2%                     | 0.6   | 919              | 77682    |
| <b>C</b> -a-c-t-c- <b>C</b> | rs1006890  | 0                  | 0%                     | 0.0   | 307              | 77989    |
| <b>C</b> -a-c-t-t- <b>C</b> | rs2253861  | 32                 | 65%                    | 35.0  | 507              | 78496    |
| Total                       |            | 49                 | Total meiosis analyzed |       | 358,000          |          |

**Crossover distribution for Interval 15**

Individual 7006

**Type A**

|                 | SNP       | # of<br>crossovers | %<br>recombinants      | cm/Mb | fragment<br>size | Position |
|-----------------|-----------|--------------------|------------------------|-------|------------------|----------|
| Start           | rs2837276 |                    |                        |       |                  | 83899    |
| T-a-a-a-t-a-g-C | rs3787931 | 0                  | 0%                     | 0.0   | 318              | 84217    |
| T-g-a-a-t-a-g-C | rs8127700 | 0                  | 0%                     | 0.0   | 1019             | 85236    |
| T-g-g-a-t-a-g-C | rs2837282 | 0                  | 0%                     | 0.0   | 1297             | 86533    |
| T-g-g-g-t-a-g-C | rs2837286 | 0                  | 0%                     | 0.0   | 2342             | 88875    |
| T-g-g-g-c-a-g-C | rs2244084 | 0                  | 0%                     | 0.0   | 759              | 89634    |
| T-g-g-g-c-g-g-C | rs2244188 | 32                 | 89%                    | 81.1  | 1195             | 90829    |
| T-g-g-g-c-g-a-C | rs2244189 | 4                  | 11%                    | 209.0 | 58               | 90887    |
| Total           |           | 36                 | Total meiosis analyzed |       | 66,000           |          |

Individual 7006

**Type B**

|                 | SNP       | # of<br>crossovers | %<br>recombinants      | cm/Mb | fragment<br>size | Position |
|-----------------|-----------|--------------------|------------------------|-------|------------------|----------|
| Start           | rs2837276 |                    |                        |       |                  | 83899    |
| G-g-g-g-c-g-a-T | rs3787931 | 0                  | 0%                     | 0.0   | 318              | 84217    |
| G-a-g-g-c-g-a-T | rs8127700 | 0                  | 0%                     | 0.0   | 1019             | 85236    |
| G-a-a-g-c-g-a-T | rs2837282 | 0                  | 0%                     | 0.0   | 1297             | 86533    |
| G-a-a-a-c-g-a-T | rs2837286 | 0                  | 0%                     | 0.0   | 2342             | 88875    |
| G-a-a-a-t-g-a-T | rs2244084 | 0                  | 0%                     | 0.0   | 759              | 89634    |
| G-a-a-a-t-a-a-T | rs2244188 | 20                 | 83%                    | 76.1  | 1195             | 90829    |
| G-a-a-a-t-a-g-T | rs2244189 | 4                  | 17%                    | 313.5 | 58               | 90887    |
| Total           |           | 24                 | Total meiosis analyzed |       | 44,000           |          |

Individual 5088

**Type A**

|               | SNP       | # of<br>crossovers | %<br>recombinants      | cm/Mb | fragment<br>size | Position |
|---------------|-----------|--------------------|------------------------|-------|------------------|----------|
| Start         | rs2837276 |                    |                        |       |                  | 83899    |
| T-a-a-a-t-a-C | rs3787931 | 0                  | 0%                     | 0.0   | 318              | 84217    |
| T-g-a-a-t-a-C | rs8127700 | 0                  | 0%                     | 0.0   | 1019             | 85236    |
| T-g-g-a-t-a-C | rs2837282 | 0                  | 0%                     | 0.0   | 1297             | 86533    |
| T-g-g-g-t-a-C | rs2837286 | 0                  | 0%                     | 0.0   | 2342             | 88875    |
| T-g-g-g-c-a-C | rs2244084 | 0                  | 0%                     | 0.0   | 759              | 89634    |
| T-g-g-g-c-g-C | rs2244189 | 37                 | 100%                   | 89.5  | 1253             | 90887    |
| Total         |           | 37                 | Total meiosis analyzed |       | 66,000           |          |

Individual 5088

**Type B**

|               | SNP       | # of<br>crossovers | %<br>recombinants      | cm/Mb | fragment<br>size | Position |
|---------------|-----------|--------------------|------------------------|-------|------------------|----------|
| Start         | rs2837276 |                    |                        |       |                  | 83899    |
| G-g-g-g-c-g-T | rs3787931 | 0                  | 0%                     | 0.0   | 318              | 84217    |
| G-a-g-g-c-g-T | rs8127700 | 0                  | 0%                     | 0.0   | 1019             | 85236    |
| G-a-a-g-c-g-T | rs2837282 | 0                  | 0%                     | 0.0   | 1297             | 86533    |
| G-a-a-a-c-g-T | rs2837286 | 0                  | 0%                     | 0.0   | 2342             | 88875    |
| G-a-a-a-t-g-T | rs2244084 | 0                  | 0%                     | 0.0   | 759              | 89634    |
| G-a-a-a-t-a-T | rs2244189 | 12                 | 100%                   | 79.8  | 1253             | 90887    |
| Total         |           | 12                 | Total meiosis analyzed |       | 24,000           |          |

Individual 5023

Type A

|                               | SNP       | # of<br>crossovers | %<br>recombinants      | cm/Mb | fragment<br>size | Position |
|-------------------------------|-----------|--------------------|------------------------|-------|------------------|----------|
| Start                         | rs2837276 |                    |                        |       |                  | 83899    |
| <b>T</b> -a-a-a-t-a- <b>C</b> | rs3787931 | 0                  | 0%                     | 0.0   | 318              | 84217    |
| <b>T</b> -g-a-a-t-a- <b>C</b> | rs8127700 | 0                  | 0%                     | 0.0   | 1019             | 85236    |
| <b>T</b> -g-g-a-t-a- <b>C</b> | rs2837282 | 0                  | 0%                     | 0.0   | 1297             | 86533    |
| <b>T</b> -g-g-g-t-a- <b>C</b> | rs2837286 | 0                  | 0%                     | 0.0   | 2342             | 88875    |
| <b>T</b> -g-g-g-c-a- <b>C</b> | rs2244084 | 0                  | 0%                     | 0.0   | 759              | 89634    |
| <b>T</b> -g-g-g-c-g- <b>C</b> | rs2244189 | 23                 | 100%                   | 55.6  | 1253             | 90887    |
| Total                         |           | 23                 | Total meiosis analyzed |       | 66,000           |          |

Individual 5023

Type B

|                               | SNP       | # of<br>crossovers | %<br>recombinants      | cm/Mb | fragment<br>size | Position |
|-------------------------------|-----------|--------------------|------------------------|-------|------------------|----------|
| Start                         | rs2837276 |                    |                        |       |                  | 83899    |
| <b>G</b> -g-g-g-c-g- <b>T</b> | rs3787931 | 0                  | 0%                     | 0.0   | 318              | 84217    |
| <b>G</b> -a-g-g-c-g- <b>T</b> | rs8127700 | 0                  | 0%                     | 0.0   | 1019             | 85236    |
| <b>G</b> -a-a-g-c-g- <b>T</b> | rs2837282 | 0                  | 0%                     | 0.0   | 1297             | 86533    |
| <b>G</b> -a-a-a-c-g- <b>T</b> | rs2837286 | 0                  | 0%                     | 0.0   | 2342             | 88875    |
| <b>G</b> -a-a-a-t-g- <b>T</b> | rs2244084 | 0                  | 0%                     | 0.0   | 759              | 89634    |
| <b>G</b> -a-a-a-t-a- <b>T</b> | rs2244189 | 43                 | 100%                   | 78.0  | 1253             | 90887    |
| Total                         |           | 43                 | Total meiosis analyzed |       | 88,000           |          |
