# Supplementary material
Source: PubMed Central journal article supplement (PMC1464822)
Supplement: pgen.0020070.sd003.pdf [file pgen.0020070.sd003.pdf]

**Protocol S3-Motif table.** Sequence motifs found to be represented in the 103 kb region analyzed by sperm typing. These motifs were overrepresented in hot spots compared to cold areas as described by Myers et al. Shown here are the sequence of the motif (column 1), the number of times it was found in the 103 kb region analyzed by sperm typing (column 2), how many were within the PCP4-1a, PCP4-1b or PCP4-2 hot spots (column 3), and the specific hot spot harboring the motif (column 4).

| Motif     | Number of times motif is found in the 103kb region | Number of times motif is present in hot spots (kb) | Details                       |
|-----------|----------------------------------------------------|----------------------------------------------------|-------------------------------|
| GAAAAAAAA | 6                                                  | 1                                                  | PCP4-1a                       |
| AAAAAAAAA | 50                                                 | 0                                                  |                               |
| CCTCCCTG  | 3                                                  | 0                                                  |                               |
| CCCCACCC  | 2                                                  | 2                                                  | 1 in PCP4-1a and 1 in PCP4-1b |
| CCCACCCC  | 1                                                  | 0                                                  |                               |
| CCTCCTCT  | 2                                                  | 0                                                  |                               |
| TCCTCCCT  | 6                                                  | 0                                                  |                               |
| CCTCCCT   | 21                                                 | 1                                                  | PCP4-2                        |
| CCTTCCC   | 21                                                 | 0                                                  |                               |
| CTCCTCC   | 20                                                 | 0                                                  |                               |
| TCCCCAG   | 15                                                 | 0                                                  |                               |
| CCCCACC   | 8                                                  | 1                                                  | PCP4-1a                       |
| GGGGGT    | 9                                                  | 0                                                  |                               |
| CCCCCT    | 24                                                 | 1                                                  | PCP4-2                        |
| CCCCCA    | 24                                                 | 0                                                  |                               |
| CCCTGC    | 32                                                 | 0                                                  |                               |
| CCCCAG    | 39                                                 | 1                                                  | PCP4-1a                       |
| CCCCC     | 50                                                 | 2                                                  | 1 in PCP4-1a and 1 in PCP4-2  |
| CCCCG     | 28                                                 | 1                                                  | PCP4-1a                       |
| GGCCC     | 50                                                 | 4                                                  | 3 in PCP4a and 1 in PCP4-1b   |
| GCCCC     | 50                                                 | 2                                                  | 1 in PCP4a and 1 in PCP4-1b   |
| CCCGC     | 24                                                 | 0                                                  |                               |
