# Supplementary material
Source: PubMed Central journal article supplement (PMC1464822)
Supplement: pgen.0020070.sd004.pdf [file pgen.0020070.sd004.pdf]

**Protocol S4- PCR conditions for measuring the number of crossovers and amplifiable genomes.**

**A. List of PCR conditions used for detecting recombinants.** The following is a list of the PCR conditions used to preferentially amplify recombinants in each interval. Every PCR reaction contained 0.4 uM of each of the appropriate forward and reverse allele-specific primers, which had 2-4 phosphorothioate bonds and sometimes mismatches at the 3' end. Primers used in the 1<sup>st</sup> and 2<sup>nd</sup> round are labeled 1<sup>st</sup> PCR or 2<sup>nd</sup> PCR Forward/Reverse (Fwd/Rev), respectively. Red letters in bold refer to mismatches in the primer sequence to improve the difference between the amplification of recombinants over non-recombinants and asterisks denote phosphorothioate bonds. These bonds increase the specificity of the primer and also protect the 3' end of the primer from the digestion of the 3'-5' exonuclease activity of the polymerase. Underlined nucleotides in lower case are G/C tails added to increase the melting temperature of the primer. The 1<sup>st</sup> round of PCR was set up in a separate biosafety cabinet irradiated beforehand with UV light and carried out in a DNA Engine Tetrad 2 (MJResearch). A 0.5ul aliquot of the first round amplification product was added to the 2<sup>nd</sup> round and amplified using a 7900HT Real-Time PCR System (Applied Biosystems). Both 1<sup>st</sup> and 2<sup>nd</sup> round PCR reactions were performed in 384-well plates in volumes of 10 ul. Shown in red before each primer list are the haplotypes of the measured recombinant. The nucleotides in parenthesis represent InDels.

Interval 1:

We only used for this interval a single round of PCR to count the recombinants. Both primers annealed to InDels making the reaction very specific and eliminating the need of a second PCR round with primers annealing to an internal set of SNPs.

Recombinant haplotype: (tt) (tgc)

| Primers                 | SNP                          | Sequence                                    |
|-------------------------|------------------------------|---------------------------------------------|
| 1 <sup>st</sup> PCR Fwd | 20686<br>(Marshfield InDel)  | <u>gggc</u> CCCCAAACCCCAAATAAAAAACT*C*T*T*T |
| 1 <sup>st</sup> PCR Rev | 209377<br>(Marshfield InDel) | GCCTTCCAAGATGGGC*A*G*C*A                    |

Reaction conditions: See methods (Expand Long Template buffer 2)

Cycling conditions:

1<sup>st</sup> PCR:

92°C 2'  
92°C 10''  
62°C 30''  
68°C 6' } Repeat 36x

Interval 2:

Recombinant haplotype: (tgc)t ag

| Primers                 | SNP                          | Sequence                             |
|-------------------------|------------------------------|--------------------------------------|
| 1 <sup>st</sup> PCR Fwd | 209377<br>(Marshfield InDel) | agtaaatggtatagttcc*t*g*c*t           |
| 1 <sup>st</sup> PCR Rev | rs461019                     | CCTATTGAAATAGAAAAAA*T* <b>T</b> *G*C |
| 2 <sup>nd</sup> PCR Fwd | rs462782                     | cttcagaacatctgtctttca*a*c*t          |
| 2 <sup>nd</sup> PCR Rev | rs461466                     | TTTGGTCAAACCTTACAAACTCA*T*G*A*T      |

Reaction conditions: See methods (Expand Long Template buffer 2)

Cycling conditions:

1<sup>st</sup> PCR:

92°C 2'  
92°C 10''  
52°C 30''  
68°C 4' } Repeat 10x  
92°C 15''  
52°C 30''  
68°C 4'+20'' } Repeat 15x

2<sup>nd</sup> PCR:

92°C 2'  
92°C 10''  
63°C 30''  
68°C 4' } Repeat 5x  
92°C 15''  
63°C 30''  
68°C 4'+20'' } Repeat 35x

Interval 3:

Recombinant haplotype: **ct tc**

| Primers                 | SNP       | Sequence                                  |
|-------------------------|-----------|-------------------------------------------|
| 1 <sup>st</sup> PCR Fwd | rs926080  | GATCAAGCAGCATTTTCTAGT*G* <b>T</b> *A*C    |
| 1 <sup>st</sup> PCR Rev | rs2837238 | <u>cgg</u> TCTATTTC AACCAATATCCAT*T*G*C*A |
| 2 <sup>nd</sup> PCR Fwd | rs2837237 | TCATTCTGGCTTCTGTTCCCA*T* <b>T</b> *A*T    |
| 2 <sup>nd</sup> PCR Rev | rs459814  | TGGTTTTGCAGGCCTGATCTT*C* <b>C</b> *C*A    |

Reaction conditions: See methods (Expand Long Template buffer 2)

Cycling conditions:

1<sup>st</sup> PCR:

92°C 2'  
92°C 10''  
58°C 30''  
68°C 8' } Repeat 25x

2<sup>nd</sup> PCR:

92°C 2'  
92°C 10''  
61°C 30''  
68°C 7' } Repeat 38x

Interval 4:

Recombinant haplotype: **tt ag**

| Primers                 | SNP       | Sequence                                  |
|-------------------------|-----------|-------------------------------------------|
| 1 <sup>st</sup> PCR Fwd | rs459814  | TATCAGGTCATGATCCAG*A* <b>T</b> *A*T       |
| 1 <sup>st</sup> PCR Rev | rs2837241 | <u>cgg</u> TCTATCACAGTTTATAATTTTC*T*C     |
| 2 <sup>nd</sup> PCR Fwd | rs2837238 | <u>gggc</u> GTTCACTATTACTATTAAAAT*A*A*C*T |
| 2 <sup>nd</sup> PCR Rev | rs2837240 | TTTTCTCCCTTGCCT*A*G*G*T                   |

Reaction conditions: See methods (Expand Long Template buffer 2)

Cycling conditions:

1<sup>st</sup> PCR:

92°C 2'  
92°C 10''  
54°C 30'' } Repeat 10x  
68°C 4'  
92°C 15''  
54°C 30'' } Repeat 15x  
68°C 4'+10''

2<sup>nd</sup> PCR:

92°C 2'  
92°C 10''  
52°C 30'' } Repeat 5x  
68°C 4'  
92°C 15''  
52°C 30'' } Repeat 35x  
68°C 4'+10''

Interval 5:

Recombinant haplotype: **tc tc**

| Primers                 | SNP       | Sequence                     |
|-------------------------|-----------|------------------------------|
| 1 <sup>st</sup> PCR Fwd | rs741866  | CAATTTTGGCTGTCAAGG*G*T*T     |
| 1 <sup>st</sup> PCR Rev | rs409989  | CCAGTGAAAAGGAATGCTTT*C*T*C*G |
| 2 <sup>nd</sup> PCR Fwd | rs1004663 | GTCCACAATGGCTTACCG*A*A*A*C   |
| 2 <sup>nd</sup> PCR Rev | rs2837246 | CTAGAAAATGAAAGTAAGCC*T*C*A*A |

Reaction conditions: See methods (Expand Long Template buffer 2)

Cycling conditions:

1<sup>st</sup> PCR:

92°C 2'  
92°C 10''  
62°C 30'' } Repeat 10x  
68°C 8'  
92°C 15''  
62°C 30'' } Repeat 13x  
68°C 8'+20''

2<sup>nd</sup> PCR:

92°C 2'  
92°C 10''  
52°C 30'' } Repeat 10x  
68°C 4'  
92°C 15''  
52°C 30'' } Repeat 35x  
68°C 4'+10''

Interval 6:

Recombinant haplotype: **tc at**

| Primers                 | SNP       | Sequence                                |
|-------------------------|-----------|-----------------------------------------|
| 1 <sup>st</sup> PCR Fwd | rs2837246 | ATGAGTCTTTAAGGAAAA*C*A*A*T              |
| 1 <sup>st</sup> PCR Rev | rs398802  | AGAGACAAGTTACAGAAAAG*A*T*A              |
| 2 <sup>nd</sup> PCR Fwd | rs409989  | AAGAACATATTTTCATTAATTT*A*C* <b>T</b> *C |
| 2 <sup>nd</sup> PCR Rev | rs2837255 | CACTTCATCCCATCA*T*G*A*T                 |

Reaction conditions: See methods (Expand Long Template buffer 3)

Cycling conditions:

1<sup>st</sup> PCR:

92°C 2'  
92°C 10''  
56°C 30'' } Repeat 10x  
68°C 8'  
92°C 15''  
54°C 30'' } Repeat 18x  
68°C 8'+10''

2<sup>nd</sup> PCR:

92°C 2'  
92°C 10''  
54°C 30'' } Repeat 10x  
68°C 5'  
92°C 15''  
52°C 30'' } Repeat 35x  
68°C 5'+10''

Interval 7:

Recombinant haplotype: a(ag) tt

| Primers                 | SNP                        | Sequence                       |
|-------------------------|----------------------------|--------------------------------|
| 1 <sup>st</sup> PCR Fwd | rs2837255                  | AATGGGGCTAATTATGC*C*C*A*A      |
| 1 <sup>st</sup> PCR Rev | rs43859                    | TTAAATTATTCCCTATGTATGG*A*T*G*A |
| 2 <sup>nd</sup> PCR Fwd | 222230<br>Marshfield InDel | CACACAAAGATGACA*G*A*G*G        |
| 2 <sup>nd</sup> PCR Rev | rs389885                   | actaatTTGcaagactca*a*t*a*a     |

Cycling conditions: Expand Long Template buffer 3

1<sup>st</sup> PCR:

92°C 2'  
92°C 10''  
54°C 30'' } Repeat 10x  
68°C 10'  
92°C 15''  
54°C 30'' } Repeat 18x  
68°C 10'+10''

2<sup>nd</sup> PCR: Expand Long Template buffer 2

92°C 2'  
92°C 10''  
56°C 30'' } Repeat 10x  
68°C 4'  
92°C 15''  
56°C 30'' } Repeat 35x  
68°C 4'+10''

Interval 8:

Recombinant haplotype: **gt cg**

| Primers                 | SNP      | Sequence                          |
|-------------------------|----------|-----------------------------------|
| 1 <sup>st</sup> PCR Fwd | rs398802 | GATTTGCTTACTCACAATC*T*A*A*G       |
| 1 <sup>st</sup> PCR Rev | rs415573 | GGATCTCTGTCTTGTC*A*C* <b>T</b> *T |
| 2 <sup>nd</sup> PCR Fwd | rs389885 | gcagctcccttctt*t*t*g*t            |
| 2 <sup>nd</sup> PCR Rev | rs438591 | TTAAATTATTCCTATGTATGG*A*T*G*G     |

Cycling conditions:

1<sup>st</sup> PCR: Expand Long Template buffer 3

92°C 2'

92°C 10''  
50°C 30''  
68°C 8' } Repeat 10x

92°C 15''  
50°C 30''  
68°C 8'+10'' } Repeat 18x

2<sup>nd</sup> PCR: Expand Long Template buffer 2

92°C 2'

92°C 10''  
52°C 30''  
68°C 6' } Repeat 10x

92°C 15''  
52°C 30''  
68°C 6'+10'' } Repeat 35x



Interval 9:

Recombinant haplotype: **ta tg**

| Primers                 | SNP       | Sequence                              |
|-------------------------|-----------|---------------------------------------|
| 1 <sup>st</sup> PCR Fwd | rs438591  | <u>cgg</u> TGAGTTATAAAAATGACC*T*T*T*T |
| 1 <sup>st</sup> PCR Rev | rs2299745 | AGAAAAGTGGGATGT*G*C*C*C               |
| 2 <sup>nd</sup> PCR Fwd | rs415573  | CGTAGCACTTGGAATTAGAA*G*A              |
| 2 <sup>nd</sup> PCR Rev | rs2299743 | aggttcaaagaaggtga*c*a*g*a             |

Reaction conditions: See methods (Expand Long Template buffer 2)

Cycling conditions:

1<sup>st</sup> PCR:

92°C 2'  
92°C 10''  
58°C 30'' } Repeat 25x  
68°C 8'

2<sup>nd</sup> PCR:

92°C 2'  
92°C 10''  
58°C 30'' } Repeat 37x  
68°C 8'

Interval 10:

Recombinant haplotype: **tg gg**

| Primers                 | SNP       | Sequence                             |
|-------------------------|-----------|--------------------------------------|
| 1 <sup>st</sup> PCR Fwd | rs2299743 | agtgtcaggctgtctct*g*c*a*t            |
| 1 <sup>st</sup> PCR Rev | rs2183577 | AACCAACCAATGTGTGCAC*T* <b>C</b> *T*C |
| 2 <sup>nd</sup> PCR Fwd | rs2299745 | TGGATAAAAGCACAC*A*A*G*G              |
| 2 <sup>nd</sup> PCR Rev | rs8127562 | cttaaccaatcctc*c*c*a*t               |

Cycling conditions:

1<sup>st</sup> PCR: Expand Long Template buffer 3

92°C 2'

92°C 10''  
56°C 30''  
68°C 8' } Repeat 10x

92°C 15''  
56°C 30''  
68°C 8'+10'' } Repeat 15x

2<sup>nd</sup> PCR: Expand Long Template buffer 3

92°C 2'

92°C 10''  
54°C 30''  
68°C 10' } Repeat 10x

92°C 15''  
54°C 30''  
68°C 10'+10'' } Repeat 35x

Interval 11:

Recombinant haplotype: **gg tc**

| Primers                 | SNP       | Sequence                    |
|-------------------------|-----------|-----------------------------|
| 1 <sup>st</sup> PCR Fwd | rs8127562 | actttgggagacc*c*a*g*g       |
| 1 <sup>st</sup> PCR Rev | rs2299751 | CTGCATATGTCAAAACTCAT*C*G    |
| 2 <sup>nd</sup> PCR Fwd | rs2183577 | GAGGACAGTCAATTACATT*T*T*T*G |
| 2 <sup>nd</sup> PCR Rev | rs2299749 | agcctcagtgtctgtttta*t*t*a*a |

Reaction conditions: See methods (Expand Long Template buffer 2)

Cycling conditions:

1<sup>st</sup> PCR:

92°C 2'  
92°C 10''  
56°C 30'' } Repeat 10x  
68°C 5'  
92°C 10''  
56°C 30'' } Repeat 10x  
68°C 5'+10''

2<sup>nd</sup> PCR:

92°C 2'  
92°C 10''  
58°C 30'' } Repeat 10x  
68°C 5'  
92°C 10''  
58°C 30'' } Repeat 35x  
68°C 5'+10''

Interval 12:

Recombinant haplotype: **gt cc**

| Primers                 | SNP       | Sequence                   |
|-------------------------|-----------|----------------------------|
| 1 <sup>st</sup> PCR Fwd | rs2299749 | tgggtatattgttattct*c*a*t*g |
| 1 <sup>st</sup> PCR Rev | rs2091891 | tcgtgccacggt*a*c*t*g       |
| 2 <sup>nd</sup> PCR Fwd | rs2299751 | tctacccttttagttgat*g*t*t*t |
| 2 <sup>nd</sup> PCR Rev | rs2299754 | ATGGTTGGACTG*G*G*C*G       |

Reaction conditions: See methods (Expand Long Template buffer 2)

Cycling conditions:

1<sup>st</sup> PCR:

92°C 2'  
92°C 10''  
54°C 30'' } Repeat 10x  
68°C 4'  
92°C 15''  
54°C 30'' } Repeat 15x  
68°C 4'+10''

2<sup>nd</sup> PCR:

92°C 2'  
92°C 10''  
58°C 30'' } Repeat 5x  
68°C 4'  
92°C 15''  
58°C 30'' } Repeat 35x  
68°C 4'+10''

Interval 13 type A:

Recombinant haplotype: **cc ca**

| Primers                 | SNP       | Sequence                  |
|-------------------------|-----------|---------------------------|
| 1 <sup>st</sup> PCR Fwd | rs2299754 | AGTGGTGAGCC*C*C*C*C       |
| 1 <sup>st</sup> PCR Rev | rs2276524 | ggtcaaatgaacagac*a*g*a*t  |
| 2 <sup>nd</sup> PCR Fwd | rs2091891 | tgctctgtcaccagg*c*t*t*c   |
| 2 <sup>nd</sup> PCR Rev | rs2253861 | CATCTTCCTGGATGCTC*A*T*C*G |

Reaction conditions: See methods (Expand Long Template buffer 2)

Cycling conditions:

1<sup>st</sup> PCR:

92°C 2'  
92°C 10''  
59°C 30''  
68°C 6' } Repeat 25x

2<sup>nd</sup> PCR:

92°C 2'  
92°C 10''  
60°C 30''  
68°C 6' } Repeat 37x

Interval 13 type B:

Recombinant haplotype: **tg tg**

| Primers                 | SNP       | Sequence                           |
|-------------------------|-----------|------------------------------------|
| 1 <sup>st</sup> PCR Fwd | rs2299754 | AGTGGTGAGCC*C*C*C*T                |
| 1 <sup>st</sup> PCR Rev | rs2276524 | Ggtcaaatgaacagac*a*g*a*c           |
| 2 <sup>nd</sup> PCR Fwd | rs2091891 | tgctctgtcaccagg*c*t* <b>t</b> *g   |
| 2 <sup>nd</sup> PCR Rev | rs2253861 | CATCTTCCTGGATGCTC*A* <b>T</b> *C*A |

Reaction conditions: See methods (Expand Long Template buffer 2)

Cycling conditions:

1<sup>st</sup> PCR:

92°C 2'

92°C 10''  
56°C 30''  
68°C 4' } Repeat 10x

92°C 15''  
56°C 30''  
68°C 4'+10'' } Repeat 15x

2<sup>nd</sup> PCR:

92°C 2'

92°C 10''  
56°C 30''  
68°C 4' } Repeat 10x

92°C 15''  
56°C 30''  
68°C 4'+10'' } Repeat 35x

Interval 14:

Recombinant haplotype: **tg tg**

| Primers                 | SNP       | Sequence                             |
|-------------------------|-----------|--------------------------------------|
| 1 <sup>st</sup> PCR Fwd | rs2253861 | TGTCCTTCTTCTAGACTC* <b>C</b> *T*T    |
| 1 <sup>st</sup> PCR Rev | rs2837276 | ATCTGATTGATGGACAC*T*A*G*C            |
| 2 <sup>nd</sup> PCR Fwd | rs2276524 | TTAGAGAATGACCTACC*t*t* <b>c</b> *g   |
| 2 <sup>nd</sup> PCR Rev | rs2837275 | TATGATGATCATTCTACAA*T* <b>C</b> *T*A |

Reaction conditions: See methods (Expand Long Template buffer 2)

Cycling conditions:

1<sup>st</sup> PCR:

92°C 2'  
92°C 10''  
56°C 30''  
68°C 6' } Repeat 35x

2<sup>nd</sup> PCR:

92°C 2'  
92°C 10''  
52°C 30''  
68°C 6' } Repeat 37x

Interval 15 type A:

Recombinant haplotype: **tg tt**

| Primers                 | SNP       | Sequence                    |
|-------------------------|-----------|-----------------------------|
| 1 <sup>st</sup> PCR Fwd | rs2837275 | CATCTCAACCATGA*C*C*C*T      |
| 1 <sup>st</sup> PCR Rev | rs2244287 | GCTTCTGAAAACTG*C*C*T*A      |
| 2 <sup>nd</sup> PCR Fwd | rs2837276 | GCTTCCAAGTAGATGAAATTG*A*T*G |
| 2 <sup>nd</sup> PCR Rev | rs2244189 | GGCTAGTAACTAAACTGA*C*G*A    |

Reaction conditions: See methods (Expand Long Template buffer 2)

Cycling conditions:

1<sup>st</sup> PCR:

92°C 2'  
92°C 10'' }  
54°C 30'' } Repeat 10x  
68°C 8' }  
92°C 15'' }  
54°C 30'' } Repeat 15x  
68°C 8'+20'' }

2<sup>nd</sup> PCR:

92°C 2'  
92°C 10'' }  
55°C 30'' } Repeat 10x  
68°C 8' }  
92°C 15'' }  
55°C 30'' } Repeat 35x  
68°C 8'+20'' }



Interval 15 type B:

Recombinant haplotype: **gt cc**

| Primers                 | SNP       | Sequence                    |
|-------------------------|-----------|-----------------------------|
| 1 <sup>st</sup> PCR Fwd | rs2837275 | CCCATCTCAACCATGAC*C*C*G     |
| 1 <sup>st</sup> PCR Rev | rs2244287 | GCTTCTGAAAACTG*C*C*T*G      |
| 2 <sup>nd</sup> PCR Fwd | rs2837276 | GCTTCCAAGTAGATGAAATTG*A*T*T |
| 2 <sup>nd</sup> PCR Rev | rs2244189 | GGCTAGTTAACTAACTGA*C*G*G    |

Reaction conditions: See methods (Expand Long Template buffer 3)

Cycling conditions:

1<sup>st</sup> PCR:

92°C 2'  
92°C 10'' }  
56°C 30'' } Repeat 10x  
68°C 8' }  
92°C 15'' }  
56°C 30'' } Repeat 15x  
68°C 8'+10'' }

2<sup>nd</sup> PCR:

92°C 2'  
92°C 10'' }  
60°C 30'' } Repeat 10x  
68°C 6' }  
92°C 15'' }  
60°C 30'' } Repeat 35x  
68°C 6'+10'' }

Interval 16:

Recombinant haplotype: **ca ga**

| Primers                 | SNP       | Sequence                           |
|-------------------------|-----------|------------------------------------|
| 1 <sup>st</sup> PCR Fwd | rs2244287 | <u>gg</u> ATAGAATTAATGTGCA*C*A*G*C |
| 1 <sup>st</sup> PCR Rev | rs994810  | <u>ccc</u> AAGACCAACAATGAA*A*T*A*T |
| 2 <sup>nd</sup> PCR Fwd | rs2244297 | TGGGCTGAATTGTCC*T*C*A*A            |
| 2 <sup>nd</sup> PCR Rev | rs2299783 | CACAACAGGGAGTCATATTT*C*A*C         |

Reaction conditions: See methods (Expand Long Template buffer 3)

Cycling conditions:

1<sup>st</sup> PCR:

92°C 2'

92°C 10''  
55°C 30''  
68°C 4' } Repeat 10x

92°C 15''  
55°C 30''  
68°C 4'+10'' } Repeat 15x

2<sup>nd</sup> PCR:

92°C 2'

92°C 10''  
58°C 30''  
68°C 4' } Repeat 5x

92°C 15''  
58°C 30''  
68°C 4'+10'' } Repeat 35x

Interval 17:

Recombinant haplotype: **ga gt**

| Primers                 | SNP       | Sequence                         |
|-------------------------|-----------|----------------------------------|
| 1 <sup>st</sup> PCR Fwd | rs2299783 | CGGCCATTCACAG*C*T*G*G            |
| 1 <sup>st</sup> PCR Rev | rs2299785 | ccccATTATAACAATAAATTTATA*C*C*C*A |
| 2 <sup>nd</sup> PCR Fwd | rs994810  | cgATTAGAATGTGTCAAGGGA*T*G*A      |
| 2 <sup>nd</sup> PCR Rev | rs2299784 | TTCCTGCCTGCTG*G*C*T*C            |

Cycling conditions: Expand Long Template buffer 3

1<sup>st</sup> PCR:

92°C 2'

92°C 10''  
54°C 30''  
68°C 8' } Repeat 10x

92°C 15''  
54°C 30''  
68°C 8'+10'' } Repeat 20x

2<sup>nd</sup> PCR: Expand Long Template buffer 2

92°C 2'

92°C 10''  
60°C 30''  
68°C 8' } Repeat 5x

92°C 15''  
60°C 30''  
68°C 8'+10'' } Repeat 35x

**B. List of PCR conditions used to determine the number of amplifiable genomes for each interval.**

After extraction of semen and blood DNA, the quantity and purity of the DNA was determined spectrophotometrically. Duplicate aliquots, each consisting of 30ng of genomic blood or sperm DNA, were amplified using a 7900HT Real-Time PCR System (Applied Biosystems) and primers that annealed outside the SNPs used to amplify the recombinants. The reaction conditions used were as follows: 1x Expand Long Template buffer 2 or 3, 0.5mM dNTPs, 0.4uM Outside Fwd primer, 0.4uM Outside Rev primer, 0.1x SYBR Green I (Molecular Probes), and 3.75U of Expand Long Template PCR Enzyme (Roche). The total reaction volume was 50ul. The number of amplifiable genomes was estimated comparing the average of both aliquots to a standard curve consisting of duplicates of 100, 30, 10, and 3 ng of high quality genomic DNA (BD Biosciences). Typically, the number of amplifiable genomes was equivalent to the optical density of the DNA, but for sperm samples the number of amplifiable genomes was often 2-3 lower.

The PCR conditions used to determine the number of amplifiable genomes for each interval are described below.

Interval 1:

| Primers            | Primers anneal outside SNP: | Sequence                    |
|--------------------|-----------------------------|-----------------------------|
| Outside Fwd primer | 206866                      | TGGGAGGTAATTAGGGTTAAGCGAGTT |
| Outside Rev primer | 209377                      | GAGAGTAGCCCTCCTCCGTTCTGA    |

Reaction conditions: Expand Long Template buffer 2

Cycling conditions:

92°C 2'  
92°C 10''  
62°C 30''  
68°C 6' } Repeat 35x

Interval 2:

| Primers            | Primers anneal outside SNP: | Sequence                  |
|--------------------|-----------------------------|---------------------------|
| Outside Fwd primer | 209377                      | CTCTGGCACACCTCTCATTGAAGCG |
| Outside Rev primer | rs2837237                   | GGACTTGGGGAAAACAATGGGGGAT |

Reaction conditions: Expand Long Template buffer 2

Cycling conditions:

92°C 2'

92°C 10''  
68°C 10' } Repeat 37x

Interval 3:

| Primers            | Primers anneal outside SNP: | Sequence               |
|--------------------|-----------------------------|------------------------|
| Outside Fwd primer | rs926080                    | TTACTTCTTCCCACCTGTGCTT |
| Outside Rev primer | rs2837238                   | CGGTGTCTCAATGTGCTTATGT |

Reaction conditions: Expand Long Template buffer 2

Cycling conditions:

92°C 2'

92°C 10''  
58°C 30''  
68°C 8' } Repeat 35x

Interval 4:

| Primers            | Primers anneal outside SNP: | Sequence               |
|--------------------|-----------------------------|------------------------|
| Outside Fwd primer | rs2837238                   | CAACCTGCTGTCCCAGCTAGA  |
| Outside Rev primer | rs2837241                   | TCCATCTCTTCACTTGTGGATG |

Reaction conditions: Expand Long Template buffer 2

Cycling conditions:

92°C 2'

92°C 10''  
60°C 30''  
68°C 4' } Repeat 35x

Interval 5:

| Primers            | Primers anneal outside SNP: | Sequence                |
|--------------------|-----------------------------|-------------------------|
| Outside Fwd primer | rs2837240                   | AGACTGCAGCTCCAACCTATCAA |
| Outside Rev primer | rs409989                    | TTCCGGAATAGAGCACAAAGTCT |

Reaction conditions: Expand Long Template buffer 2

Cycling conditions:

92°C 2'

92°C 10''

60°C 30''

68°C 8'

} Repeat 10x

92°C 10''

60°C 30''

68°C 8'+10''

} Repeat 35x

Interval 6:

| Primers            | Primers anneal outside SNP: | Sequence               |
|--------------------|-----------------------------|------------------------|
| Outside Fwd primer | rs2837246                   | GCTCCTTAGCTGCCTGTGTTAT |
| Outside Rev primer | rs2837261                   | GAAACCATTGTCTTCCATACTC |

Reaction conditions: Expand Long Template buffer 3

Cycling conditions:

92°C 2'

92°C 10''

55°C 30''

68°C 10'

} Repeat 40x

Interval 7:

| Primers            | Primers anneal outside SNP: | Sequence                     |
|--------------------|-----------------------------|------------------------------|
| Outside Fwd primer | rs2837255                   | ATGGTAGCCTCACTCTTTCA*T*T*T*C |
| Outside Rev primer | rs2438591                   | GACAGGTAAAATCCATTCGTGA       |

Reaction conditions: Expand Long Template buffer 3

Cycling conditions:

92°C 2'

92°C 10''

58°C 30''

68°C 10'

} Repeat 40x

Interval 8:

| Primers            | Primers anneal outside SNP: | Sequence               |
|--------------------|-----------------------------|------------------------|
| Outside Fwd primer | rs398802                    | CCCCTGATTACCTTACTTCTC  |
| Outside Rev primer | rs415573                    | GGTAAAATCCATTCGTGATGCT |

Reaction conditions: Expand Long Template buffer 3

Cycling conditions:

92°C 2'

92°C 10''

52°C 30''

68°C 10'

} Repeat 35x

Interval 9:

| Primers            | Primers anneal outside SNP: | Sequence              |
|--------------------|-----------------------------|-----------------------|
| Outside Fwd primer | rs438591                    | AGGACAGGCTTGGGCATTTA  |
| Outside Rev primer | rs2299745                   | GAGGCAGAAAAGTGGGATGTG |

Reaction conditions: Expand Long Template buffer 2

Cycling conditions:

92°C 2'

92°C 10''

58°C 30''

68°C 8'

} Repeat 36x

Interval 10:

| Primers            | Primers anneal outside SNP: | Sequence               |
|--------------------|-----------------------------|------------------------|
| Outside Fwd primer | rs2299742                   | gcagaagaagagctacaat    |
| Outside Rev primer | rs2183577                   | TTTACAACCAACCAATGTGTGC |

Reaction conditions: Expand Long Template buffer 3

Cycling conditions:

92°C 2'

92°C 10''

56°C 30''

68°C 10'

} Repeat 40x

Interval 11:

| Primers            | Primer anneal outside SNP: | Sequence               |
|--------------------|----------------------------|------------------------|
| Outside Fwd primer | rs8127562                  | AATGCTTCCCTGTGGAAT     |
| Outside Rev primer | rs2837264                  | tctcatgaaggacgtaggctct |

Reaction conditions: Expand Long Template buffer 2

Cycling conditions:

92°C 2'

92°C 10''

55°C 30''

68°C 6'

} Repeat 35x



Interval 12:

| Primers            | Primers anneal outside SNP: | Sequence                |
|--------------------|-----------------------------|-------------------------|
| Outside Fwd primer | rs2299751                   | CCAGCACACTTATTTTTGAGGTT |
| Outside Rev primer | rs2837270                   | CAAGTTCCCATTAAGACACG    |

Reaction conditions: 1x Expand Long Template buffer 2

Cycling conditions:

92°C 2'

92°C 10''

58°C 30''

68°C 5'

} Repeat 35x

Interval 13:

| Primers            | Primers anneal outside SNP: | Sequence               |
|--------------------|-----------------------------|------------------------|
| Outside Fwd primer | rs2299754                   | GATGGGAAAGAAAGGGAGGAGT |
| Outside Rev primer | rs2276524                   | GGTCAAATGAACAGACAGA    |

Reaction conditions: 1x Expand Long Template buffer 2

Cycling conditions:

92°C 2'

92°C 10''

58°C 30''

68°C 6'

} Repeat 35x

Interval 14:

| Primers            | Primers anneal outside SNP: | Sequence               |
|--------------------|-----------------------------|------------------------|
| Outside Fwd primer | rs2253861                   | AAGGAAGTCATTGTGAGGGAAA |
| Outside Rev primer | rs2837276                   | CCCAGGGAATTTAACCGATG   |

Reaction conditions: 1x Expand Long Template buffer 2

Cycling conditions:

92°C 2'

92°C 10''

58°C 30''

68°C 6'

} Repeat 37x

Interval 15:

| Primers            | Primers anneal outside SNP: | Sequence                   |
|--------------------|-----------------------------|----------------------------|
| Outside Fwd primer | rs2837275                   | CGCTTCAGCTTACAGAGG*A*T*T*T |
| Outside Rev primer | rs2244297                   | GAGGGGAGAACACATCTAGCTT     |

Reaction conditions: 1x Expand Long Template buffer 3

Cycling conditions:

92°C 2'

92°C 10''

60°C 30''

68°C 8'

} Repeat 45x

Interval 16:

| Primers            | Primers anneal outside SNP: | Sequence                |
|--------------------|-----------------------------|-------------------------|
| Outside Fwd primer | rs2244287                   | AAGCAGGAGATATTCCAGGTTTC |
| Outside Rev primer | rs994810                    | ATTTTCTGGGATCAGGGCAAC   |

Reaction conditions: 1x Expand Long Template buffer 3

Cycling conditions:

92°C 2'

92°C 10''

60°C 30''

68°C 4'

92°C 10''

60°C 30''

68°C 4'+20''

} Repeat 10x

} Repeat 35x

Interval 17:

| Primers            | Primers anneal outside SNP: | Sequence               |
|--------------------|-----------------------------|------------------------|
| Outside Fwd primer | rs2299783                   | TATCTGGGCTAGAAACGGCCTA |
| Outside Rev primer | rs2299785                   | TGTTGGAGAAAAGGTCAATTCC |

Reaction conditions: 1x Expand Long Template buffer 2

Cycling conditions:

92°C 2'

92°C 10''

58°C 30''

68°C 8'

} Repeat 10x

92°C 10''

58°C 30''

68°C 8'+20''

} Repeat 35x
