# Supplementary material
Source: PubMed Central journal article supplement (PMC1464822)

### Protocol S5-Comparison of LD and sperm typing in intervals 13 and 15

**Figure 1.** Comparison of sperm typing measurements averaged for the three individuals and both reciprocal crossovers measured in interval 13 (top) with recombination predicted by the three LD based estimators, LDHat-red, Hotspotter-green, and ABC-red (bottom). Crossover data is found in Supplement 2 and data for LD based estimators is found in Supplement 6.

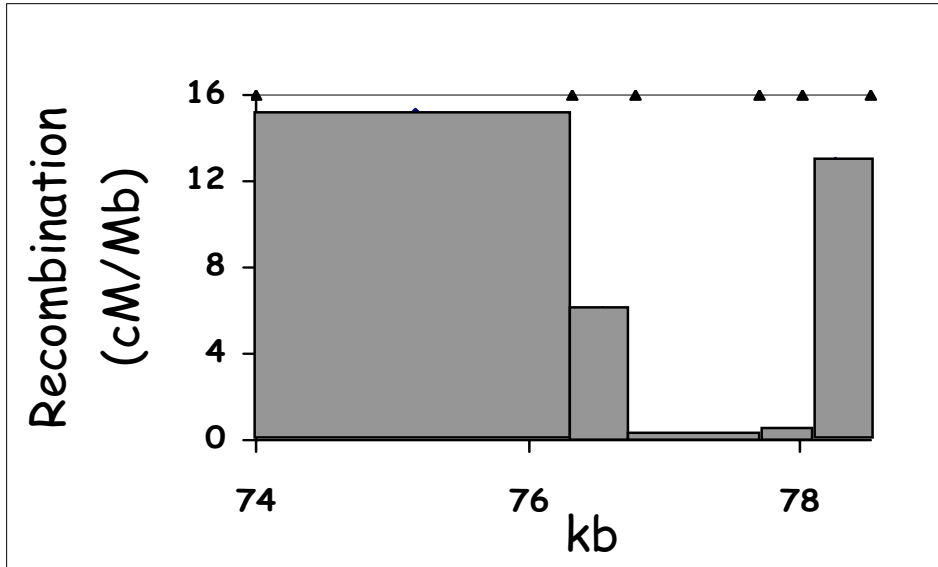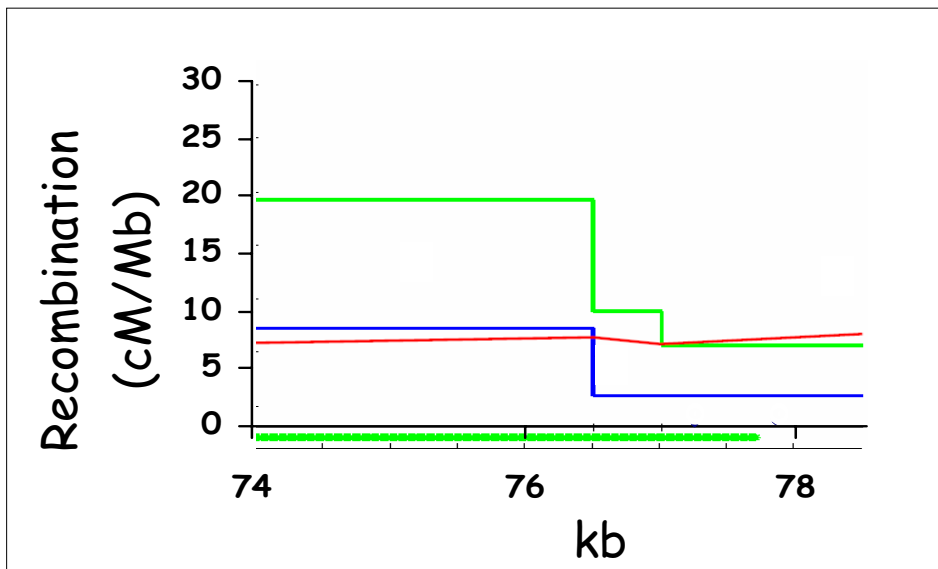

**Figure 2.** Comparison of sperm typing measurements averaged for the three individuals and both reciprocal crossovers measured in interval 15 (top) with recombination predicted by the three LD based estimators, LDHat-red, Hotspotter-green, and ABC-red (bottom). Crossover data is found in Supplement 2 and data for LD based estimators is found in Supplement 6.

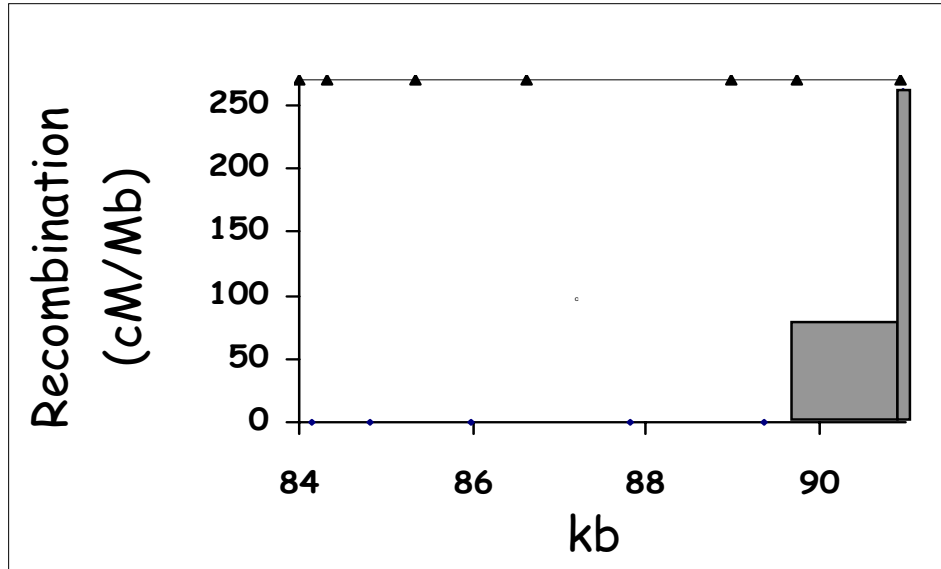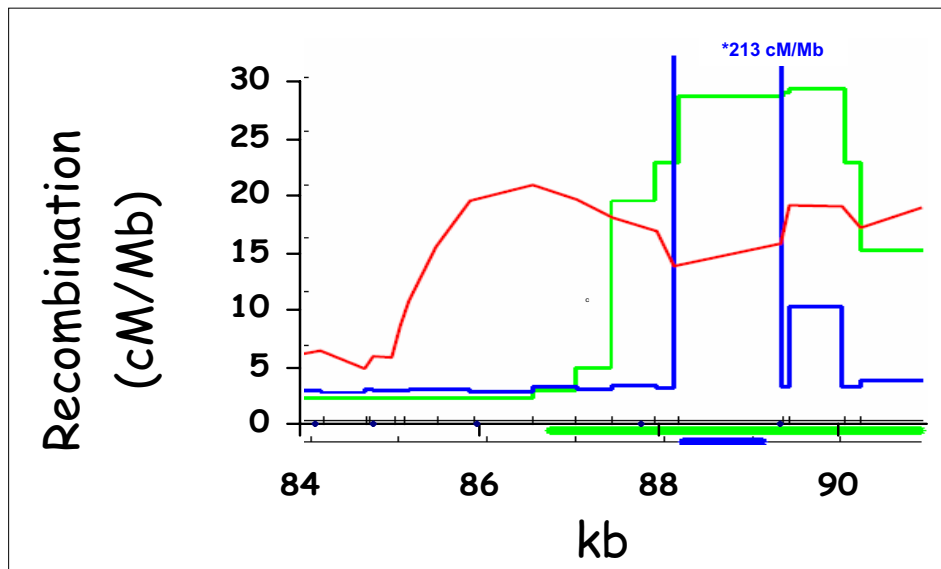

Supplement: pgen.0020070.sd005.pdf [file pgen.0020070.sd005.pdf]
